# Supplementary material for: Magnetic Multi-Enzymatic System for Cladribine Manufacturing
Source: MDPI journal article supplement (doi:10.3390/ijms232113634), 2022-11-07
Supplement: s1 [file s1]

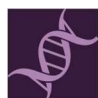

# Magnetic Multi-Enzymatic System for Cladribine Manufacturing

Guillermo Cruz <sup>1</sup>, Laura Pilar Saiz <sup>1</sup>, Muhammad Bilal <sup>2</sup>, Lobna Eltoukhy <sup>3</sup>, Christoph Loderer <sup>3,\*</sup> and Jesús Fernández-Lucas <sup>1,\*</sup>

<sup>1</sup> Applied Biotechnology Group, Universidad Europea de Madrid, Urbanización El Bosque, Calle Tajo, s/n, 28670 Villaviciosa de Odón, Spain

<sup>2</sup> Institute of Chemical Technology and Engineering, Faculty of Chemical Technology, Poznan University of Technology, Berdychowo 4, PL-60695 Poznan, Poland

<sup>3</sup> Chair of Molecular Biotechnology, Institute for Microbiology, Technische Universität Dresden, Zellescher Weg 20b, 01217 Dresden, Germany

\* Correspondence: christoph.loderer@tu-dresden.de (C.L.); jesus.fernandez2@universidadeuropea.es (J.F.-L.)

## Electronic Supplementary Information

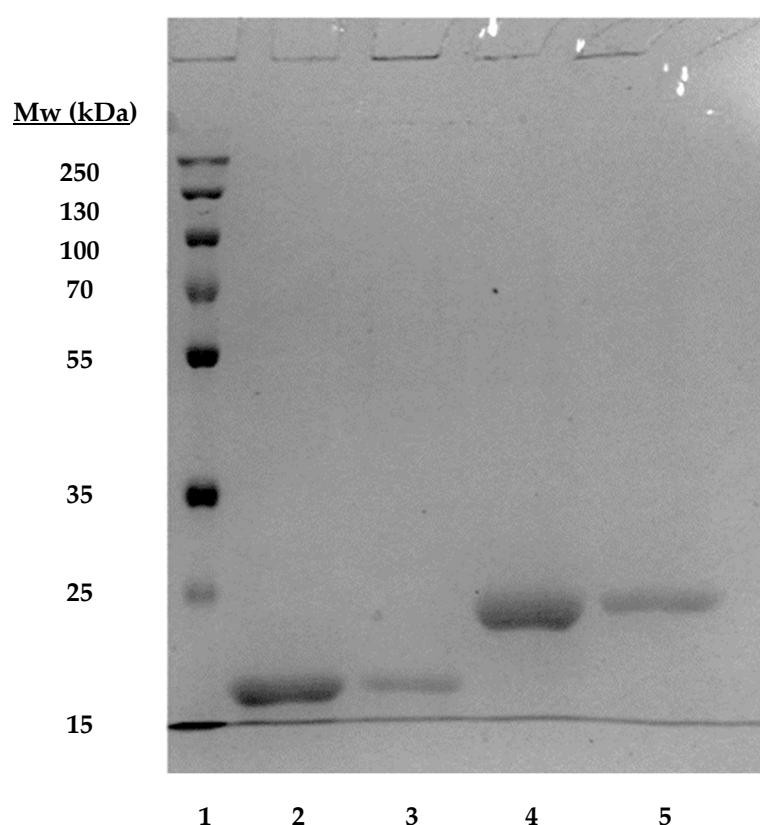

**Figure S1.** SDS-PAGE analysis of pure *Ld*NDT. **Lane 1.** Prestained standard proteins (Thermoscientific used as molecular weight markers). **Lane 2–3.** Pure fractions of soluble *Ld*NDTwt. **Lane 4–5.** Pure fractions of soluble *Ec*HPRT. *Ld*NDT: NDT from *Lactobacillus delbrueckii*; *Ec*HPRT: HPRT from *E. coli*.

## Tables

**Table S1.** Effect of enzyme/support mass ratio on the immobilization of *LmPDT* and *EcHPRT* onto MagReSyn®NTA microspheres.

| Derivative                 | Added<br>$\text{mg}_{\text{enz}}/\text{g}_{\text{support}}$ | Immobilization<br>Yield (%) | Biocatalyst<br>Load ( $\text{mg}_{\text{enz}}/\text{g}_{\text{sup-}}/\text{port}$ ) | Activity<br>(IU/ $\text{g}_{\text{support}}$ ) | Recovery<br>(%) |
|----------------------------|-------------------------------------------------------------|-----------------------------|-------------------------------------------------------------------------------------|------------------------------------------------|-----------------|
| <i>LmPDT</i> <sup>a</sup>  |                                                             |                             |                                                                                     |                                                |                 |
| <i>MLmPDT</i> 1            | 120                                                         | 100                         | 120                                                                                 | 8425 ± 384                                     | 55              |
| <i>MLmPDT</i> 2            | 160                                                         | 98                          | 157                                                                                 | 11023 ± 502                                    | 57              |
| <i>MLmPDT</i> 3            | 200                                                         | 85                          | 170                                                                                 | 11935 ± 544                                    | 63              |
| <i>EcHPRT</i> <sup>b</sup> |                                                             |                             |                                                                                     |                                                |                 |
| <i>MEcHPRT</i> 1           | 120                                                         | 100                         | 120                                                                                 | 8414 ± 123                                     | 45              |
| <i>MEcHPRT</i> 2           | 160                                                         | 100                         | 160                                                                                 | 10989 ± 311                                    | 44.5            |
| <i>MEcHPRT</i> 3           | 200                                                         | 90                          | 180                                                                                 | 12840 ± 484                                    | 45              |

<sup>a</sup> Reaction conditions: 0.6 µg of immobilized *LmPDT*, [dIno] = [Ade] = 10 mM, in 50 mM MES buffer, pH 6.5 at 40 °C, 5 min, 300 r.p.m. Vr = 80 µL. <sup>b</sup> Reaction conditions: 0.5 µg of immobilized *EcHPRT*, [Hyp] = [PRPP] = 10 mM, [MgCl<sub>2</sub>] = 12 mM, in 12 mM Tris-HCl buffer, pH 8 at 50 °C, 5-10 min, 300 r.p.m. Vr = 80 µL.
